# Supplementary material for: Role of Macrophages in Cytotoxicity, Reactive Oxygen Species Production and DNA Damage in 1,2-Dichloropropane-Exposed Human Cholangiocytes In Vitro
Source: MDPI journal article supplement (doi:10.3390/toxics9060128), 2021-06-01
Supplement: s1 [file s1]

# Supplementary Materials: Role of Macrophages in Cytotoxicity, Reactive Oxygen Species Production and DNA Damage in 1,2-Dichloropropane-Exposed Human Cholangiocytes In Vitro

Abigail Ekuban, Cai Zong, Frederick Adams Ekuban, Yusuke Kimura, Ryoya Takizawa, Kota Morikawa, Kazuo Kinoshita, Sahoko Ichihara, Seiichiroh Ohsako and Gaku Ichihara

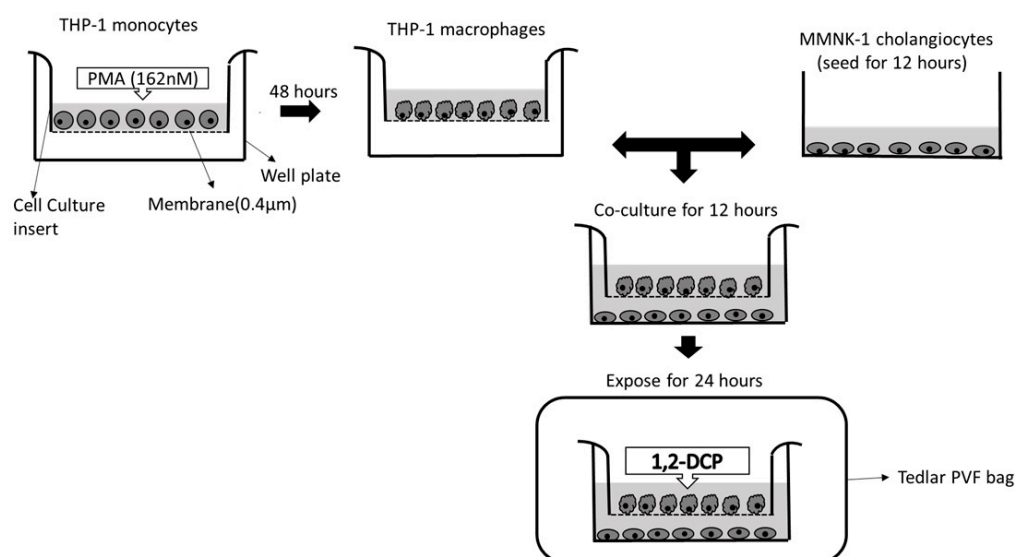

**Figure S1.** Illustration of the co-culture model. THP-1 monocytes were differentiated into macrophages by PMA at 162 nM concentration by seeding into cell culture inserts (pore size membrane: 0.4 μm) for 48 hours. MMNK-1 cholangiocytes were seeded in well plate for 12 hours and then combined with THP-1 macrophages. MMNK-1 cholangiocytes and THP-1 macrophages were co-cultured for 12 hours and then exposed to different concentrations of 1,2-DCP for 24 hours. The MMNK-1 cholangiocytes and THP-1 macrophages were placed into Tedlar polyvinyl fluoride (PVF) gas sampling bags to prevent evaporation of 1,2-DCP and incubated at 37°C.

**Table S1.** Protein concentration values for proinflammatory cytokines expression analysis by ELISA.

| 1,2-DCP Concentration(mM) | Protein Concentration (pg/ml) |               |
|---------------------------|-------------------------------|---------------|
|                           | TNF- $\alpha$                 | IL-1 $\beta$  |
| 0                         | 41 $\pm$ 10                   | 0.9 $\pm$ 0.7 |
| 0.2                       | 301 $\pm$ 91                  | 8 $\pm$ 2     |
| 0.4                       | 232 $\pm$ 14                  | 6 $\pm$ 3     |
| 0.8                       | 568 $\pm$ 457                 | 187 $\pm$ 43* |

Protein concentrations are expressed as mean  $\pm$ SD, \*p<0.05, compared with corresponding control by one-way ANOVA followed by Dunnett's test multiple comparison test.
